# Supplementary material for: Extend, Pathomechanism and Clinical Consequences of Brain Volume Changes in Anorexia Nervosa
Source: PubMed Central journal article supplement — Curr Neuropharmacol. 2018 Oct;16(8):1164–73. doi: 10.2174/1570159X15666171109145651 (PMC6187749; doi:10.2174/1570159x15666171109145651), 2018-10
Supplement: CN-16-1164_SD1.pdf [file CN-16-1164_SD1.pdf]

# SUPPLEMENTARY MATERIAL

## Extend, Pathomechanism and Clinical Consequences of Brain Volume Changes in Anorexia Nervosa

Jochen Seitz\*, Kerstin Konrad and Beate Herpertz-Dahlmann

Clinic for Child and Adolescent Psychiatry, Psychotherapy and Psychosomatics, University Hospital RWTH Aachen, Germany

**Table 1. GM and WM changes in MRI studies of patients with acute, short-term weight recovered and long-term recovered AN compared to healthy controls.**

| A) Acute AN                         | N/Age of AN-patients       | Method                                          | GM change                   | WM Change    |
|-------------------------------------|----------------------------|-------------------------------------------------|-----------------------------|--------------|
| Katzman <i>et al.</i> 1996          | 13 adol., 15.4 +/-1.2yrs   | BIS                                             | -6.2%                       | -3.6%        |
| Giordano <i>et al.</i> 2001         | 20 adults, 30 +/-5.1yrs    | Manual tracing<br>Amygdala/<br>hippocampus only | -27% amygdala-hippocampus   |              |
| Swayze <i>et al.</i> 2003           | 17 adults, 25.1 +/-7.3yrs  | BRAINS                                          | -4.2% (n.s.),               | -11.0%       |
| Connan <i>et al.</i> 2006           | 16 adults, 25.4 +/-7.5yrs  | Manual tracing<br>Hippocampus only              | -8.2% and -7.5% hippocampus |              |
| McCormick <i>et al.</i> 2008        | 18 adults, 26.6 +/-7.2yrs  | BRAINS2<br>ACC only                             | -12.5% ACC                  | n.a.         |
| Castro-Fornieles <i>et al.</i> 2009 | 12 adol., 14.5 +/-1.5yrs   | VBM                                             | -7.7%                       | -6.1%        |
| Joos <i>et al.</i> 2010             | 12 adults, 25.0 +/-4.8yrs  | VBM                                             | -4.0%                       | -2.8% (n.s.) |
| Suchan <i>et al.</i> 2010           | 15 adults, 29.5 +/-8.2yrs  | VBM                                             | -0.1% (n.s.),               | -3.3% (n.s.) |
| Gaudio <i>et al.</i> 2011           | 16 adol., 15.2 +/-1.5yrs   | VBM                                             | -8.2%                       | n.a.         |
| Boghi <i>et al.</i> 2011            | 21 adults, 29.0 +/-10.0yrs | VBM                                             | -1.0% (n.s.),               | -7.7%        |
| Roberto <i>et al.</i> 2011          | 32 adults, 26.9 +/-6.4yrs  | VBM                                             | -8.1%                       | -5.3% (n.s.) |
| Brooks <i>et al.</i> 2011           | 14 adults, 26. +/- 2.9yrs  | VBM                                             | -2.7% (n.s.)                | +4.8%(n.s.)  |
| Friedrich <i>et al.</i> 2012        | 12 adults, 24.3 +/-6.2yrs  | VBM,                                            | --4.6%                      | 0.0% (n.s.)  |
| Mainz <i>et al.</i> 2012            | 19 adol., 15.7 +/-1.5yrs   | VBM                                             | -16.0%                      | -1.9% (n.s.) |
| Frank <i>et al.</i> 2013a           | 19 adults 23.1 +/-5.8yrs   | VBM                                             | -0.3% (n.s.)                | -1.8% (n.s.) |
| Frank <i>et al.</i> 2013b           | 19 adol., 15.4 +/-1.4yrs   | VBM                                             | +2.1% (n.s.)                | +0.2% (n.s.) |
| Amianto <i>et al.</i> 2013          | 17 adults 20 +/-4 yrs      | VBM                                             | -0.2% (n.s.)                | -1.4% (n.s.) |
| Fonville <i>et al.</i> 2014         | 33 adults 23 +/- 4yrs      | VBM                                             | -1.5% (n.s.)                | +1.1% (n.s.) |
| King <i>et al.</i> 2014*            | 40 adol., 15.9 +/- 2.5yrs  | Freesurfer                                      | global cortical thinning    | n.a.         |
| Via <i>et al.</i> 2014              | 19 adults 28.4 +/- 9.6yrs  | VBM                                             | -5.3%                       | -3.5%        |

(Table 1) contd....

| <b>A) Acute AN</b>                    | <b>N/Age of AN-patients</b>  | <b>Method</b>     | <b>GM change</b>                                  |                           | <b>WM Change</b>          |
|---------------------------------------|------------------------------|-------------------|---------------------------------------------------|---------------------------|---------------------------|
| Seitz <i>et al.</i> 2015              | 55 adol. 15.5 +/- 1.8yrs     | Freesurfer        | -7.1%                                             |                           | -4.7%                     |
| Fujisawa <i>et al.</i> 2015           | 20 adol., 14.2 +/-2.8yrs     | VBM               | -10.0%                                            |                           | n.a.                      |
| Favaro <i>et al.</i> 2015             | 38 adults 26.1 +/- 7.2yrs    | Freesurfer        | -3.1%                                             |                           | +1.1% (n.s.)              |
| Burkert <i>et al.</i> 2015            | 21 adults 21.6 +/-5.7yrs     | Freesurfer        | -8.8%                                             |                           | -3.4% (n.s.)              |
| Bomba <i>et al.</i> 2013, 2015        | 11 adol, 13.6 +/-2.8yrs      | VBM               | -10.9%                                            |                           | -6.5%                     |
| Bär <i>et al.</i> 2015                | 26 adults 23 +/- 5yrs        | VBM               | -7.8%                                             |                           | -0.2% (n.s.)              |
| Bernadoni <i>et al.</i> 2016*         | 47 adol. 15.7 +/-2.4yrs      | Freesurfer        | Global cortical thinning                          |                           | n.a.                      |
| Lavagnino <i>et al.</i> 2015, 2016    | 21 adults 28.5 +/- 4yrs      | Freesurfer        | Local cortical thinning, (n.s.)                   |                           | n.a.                      |
| Pfuhl <i>et al.</i> 2016*             | 35 adol. 16.1 +/- 2.8yrs     | Freesurfer        | n.a.                                              |                           | -1.3% (n.s.)              |
| Boto <i>et al.</i> 2017               | 20 adults 27.9 +/-10.3yrs    | MorphoBox         | -7.1%                                             |                           | -6.7%                     |
| Gaudio <i>et al.</i> 2017             | 14 adol. 15.7 +/- 1.6yrs     | VBM               | -2.6% (n.s.)                                      |                           | -0.9% (n.s.)              |
| Kohmura <i>et al.</i> 2017            | 23 adults 28.5 +/- 6.5yrs    | VBM               | -8.2%                                             |                           | +0.2% (n.s.)              |
| Monzon <i>et al.</i> 2017             | 26 adol. 16.5 +/- 1.2 yrs    | VBM               | Red. in multiple cortical and subcortical regions |                           | n.a.                      |
| Scaife <i>et al.</i> 2017             | 15 adol. 16.6 +/- 1.4yrs     | FSL-VBM           | -6.3%                                             |                           | -0.4% (n.s.)              |
| <b>B) Short-term Weight Recovered</b> | <b>N/ Age of AN-patients</b> | <b>Method</b>     | <b>Recovery Length</b>                            | <b>Residual GM Change</b> | <b>Residual WM Change</b> |
| Roberto <i>et al.</i> 2011            | 32 adults, 27.1 +/-6.4yrs    | VBM               | Weight rec.                                       | -4.2%                     | -1.2% (n.s.)              |
| Swayze <i>et al.</i> 2003             | 13 adults, 25.4 +/-7.3yrs    | BRAINS            | Weight rec.                                       | -1.9% (n.s.)              | -3.5% (n.s.)              |
| Mainz <i>et al.</i> 2012              | 19 adol., 15.9 +/-1.5yrs     | VBM               | Weight rec.                                       | -12.1%                    | +0.7% (n.s.)              |
| Lazaro <i>et al.</i> 2013             | 35 adol., 16.3 +/- 1.3yrs    | VBM               | Weight rec.                                       | +0.1% (n.s.)              | -0.5% (n.s.)              |
| Bomba <i>et al.</i> 2015              | 11 adol., 13.9 +/- 2.8yrs    | VBM               | Weigh rec.                                        | -4.3%                     | 2.9% (n.s.)               |
| Bernadoni <i>et al.</i> 2016          | 35 adol., 15.7 +/- 2.4yrs    | Freesurfer        | Weight rec.                                       | CT n.s.                   | n.a.                      |
| Monzon <i>et al.</i> 2017             | 10 adol., 16.5 +/- 1.3yrs    | VBM               | Weight rec.                                       | ACC and hippocampus       | n.a.                      |
| Castro-Fornieles <i>et al.</i> 2009   | 12 adol., 14.5 +/-1.5yrs     | VBM               | 7 months post adm.                                | -1.6% (n.s.),             | -0.8% (n.s.)              |
| <b>C) Long-term Recovered AN</b>      | <b>N/ Age of AN-patients</b> | <b>Method</b>     | <b>Recovery Length</b>                            | <b>Residual GM Change</b> | <b>Residual WM Change</b> |
| McCormick <i>et al.</i> 2008          | 48 adults, 26.1 +/-7.2yrs    | BRAINS2, ACC only | 1 year                                            | -4.5% rdACC (n.s.)        |                           |
| Mühlau <i>et al.</i> 2007             | 22 adults, 23.7 +/-6.0yrs    | VBM               | 1.6 years                                         | -4.0%                     | -0.7% (n.s.)              |
| Katzman <i>et al.</i> 1997            | 6 adol, 17.0 +/-1.4yrs       | BIS               | 2.7 years                                         | -4.2%                     | -0.5% (n.s.)              |
| Wagner <i>et al.</i> 2006             | 30 adults, 25.0 +/-6.4yrs    | VBM               | 3 years                                           | +0.2% (n.s.)              | -2.0% (n.s.)              |
| Lambe <i>et al.</i> 1997              | 12 mixed, 18.9 +/-6.9yrs     | BIS               | 3 years                                           | -2.6%                     | -0.5% (n.s.)              |
| Favaro <i>et al.</i> 2015             | 20 adults, 26.3 +/-7.1yrs    | Freesurfer        | 3.2 years                                         | -0.1% (n.s.)              | -0.2% (n.s.)              |
| King <i>et al.</i> 2015*              | 34 adol, 22.7 +/- 2.9        | Freesurfer        | 4.4 years                                         | -0.7% (n.s.)              | n.a.                      |
| Scaife <i>et al.</i> 2017             | 14 adults, 27 +/- 6.5yrs     | FSL-VBM           | 4.7 years                                         | -1.9% (n.s.)              | +0.8% (n.s.)              |
| Bernadoni <i>et al.</i> 2016*         | 34 adol, 22.2 +/- 3.1yrs     | Freesurfer        | 4.7 years                                         | CT n.s.                   | n.a.                      |
| Pfuhl <i>et al.</i> 2016*             | 32 adol, 22.5 +/- 3.0yrs     | Freesurfer        | 4.7 years                                         | n.a.                      | -6.1%                     |
| Joos <i>et al.</i> 2011               | 5 adults, 19.6 +/-5.1yrs     | VBM               | 5 years                                           | -1.6% (n.s.)              | -0.3% (n.s.)              |
| Friedrich <i>et al.</i> 2012          | 13 adults, 25.0 +/-4.8yrs    | VBM               | 5.7 years                                         | -0.9% (n.s.)              | -2.9% (n.s.)              |

|                         |                          |      |           |              |              |
|-------------------------|--------------------------|------|-----------|--------------|--------------|
| Chui <i>et al.</i> 2008 | 66 mixed, 21.3 +/-2.3yrs | INSE | 6.5 years | +0.1% (n.s.) | 0,00% (n.s.) |
| Frank 2013a             | 23 adults, 30.3+/-8.8yrs | VBM  | 7.9 years | +0.9% (n.s.) | -0.8% (n.s.) |

Regional results given when global results did not reach significance; n.s.: not significant, adol.: adolescents, mixed: adolescents and adults; \*: samples overlap; rdACC: right dorsal ACC, BIS: Brain Imaging Software, BRAINS: Brain Research: Analysis of Images, Networks, and Systems, CT: cortical thickness, VBM: Voxel Based Morphometry, INSE: Intensity Normalized Stereotaxic Environment for the Classification of Tissue, FSL: FMRIB Software Library.
